# Supplementary material for: Clues to membrane fouling hidden within the microbial communities of membrane bioreactors
Source: Royal Society of Chemistry journal article supplement (doi:10.1039/c9ew00213h), 2019-01-01
Supplement: c9ew00213h1.pdf [file c9ew00213h1.pdf]

Supplementary Information for

**Clues to membrane fouling hidden within the microbial  
communities of membrane bioreactors**

Nuwan Asanka Weerasekara, Sung-Geun Woo, Craig Criddle, Tahir Iqbal, Kibaek Lee,  
Young-Jun Park, Jae-Ho Shin, Kwang-Ho Choo\*

\* Corresponding author. E-mail: [chookh@knu.ac.kr](mailto:chookh@knu.ac.kr)

This file includes:

Tables S1-S2

Fig. S1-S4

Table S1. Qualities of the synthetic wastewater used

| Component                                              | Value       |
|--------------------------------------------------------|-------------|
| Glucose (mg/L)                                         | 120         |
| Peptone (mg/L)                                         | 90.0        |
| Yeast extract (mg/L)                                   | 12.0        |
| (NH <sub>4</sub> ) <sub>2</sub> SO <sub>4</sub> (mg/L) | 96.0        |
| KH <sub>2</sub> PO <sub>4</sub> (mg/L)                 | 17.0        |
| NaHCO <sub>3</sub> (mg/L)                              | 300         |
| CaCl <sub>2</sub> .2H <sub>2</sub> O (mg/L)            | 2.40        |
| MgSO <sub>4</sub> .7H <sub>2</sub> O (mg/L)            | 24.0        |
| MnSO <sub>4</sub> .5H <sub>2</sub> O (mg/L)            | 2.16        |
| FeCl <sub>3</sub> .6H <sub>2</sub> O (mg/L)            | 0.12        |
| pH                                                     | 7.70 ± 0.10 |
| TOC (mg/L)                                             | 140 ± 5     |
| COD (mg/L)                                             | 245 ± 10    |
| Conductivity (μS/cm)                                   | 670 ± 5     |

Table S2. Qualities of the primary effluent used

| Component                                         | Value       |
|---------------------------------------------------|-------------|
| SS (mg/L)                                         | 67.0 ± 9.9  |
| Turbidity (NTU)                                   | 33.4 ± 0.2  |
| Turbidity after centrifugation <sup>a</sup> (NTU) | 1.78 ± 0.17 |
| Mean particle size (µm)                           | 0.834       |
| COD (mg/L)                                        | 59.5 ± 2.12 |
| SCOD (mg/L)                                       | 22.1 ± 0.8  |
| pH                                                | 6.79 ± 0.02 |
| Conductivity (µS/cm)                              | 593         |

<sup>a</sup> Centrifugation was performed for 10 min at 4,000 rpm (2,951 g).

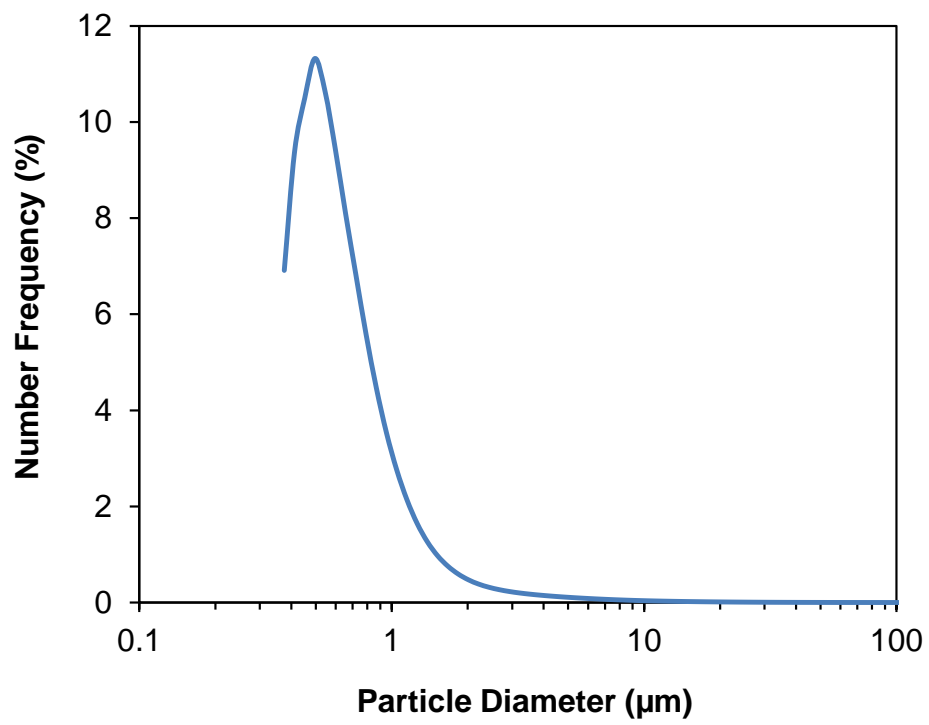

Fig. S1. Particle size distribution of the supernatant of the primary effluent used.

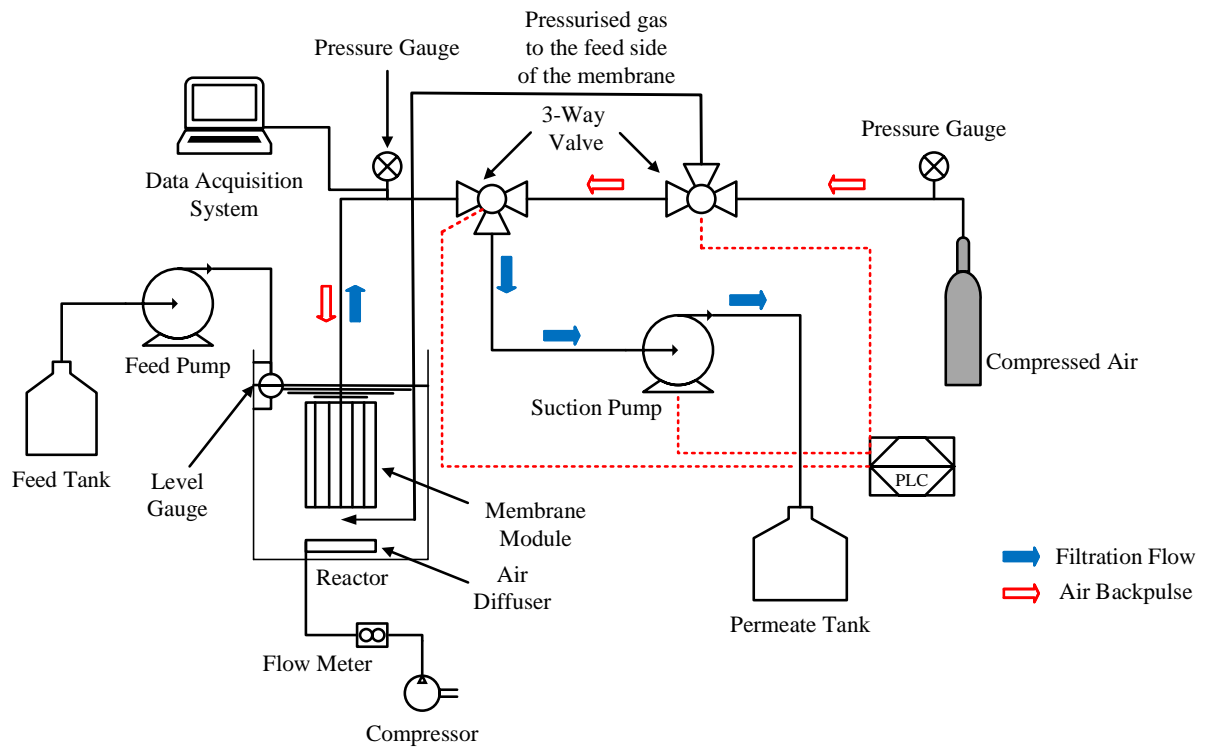

Fig. S2. A schematic of the laboratory-scale MBR used in this study.

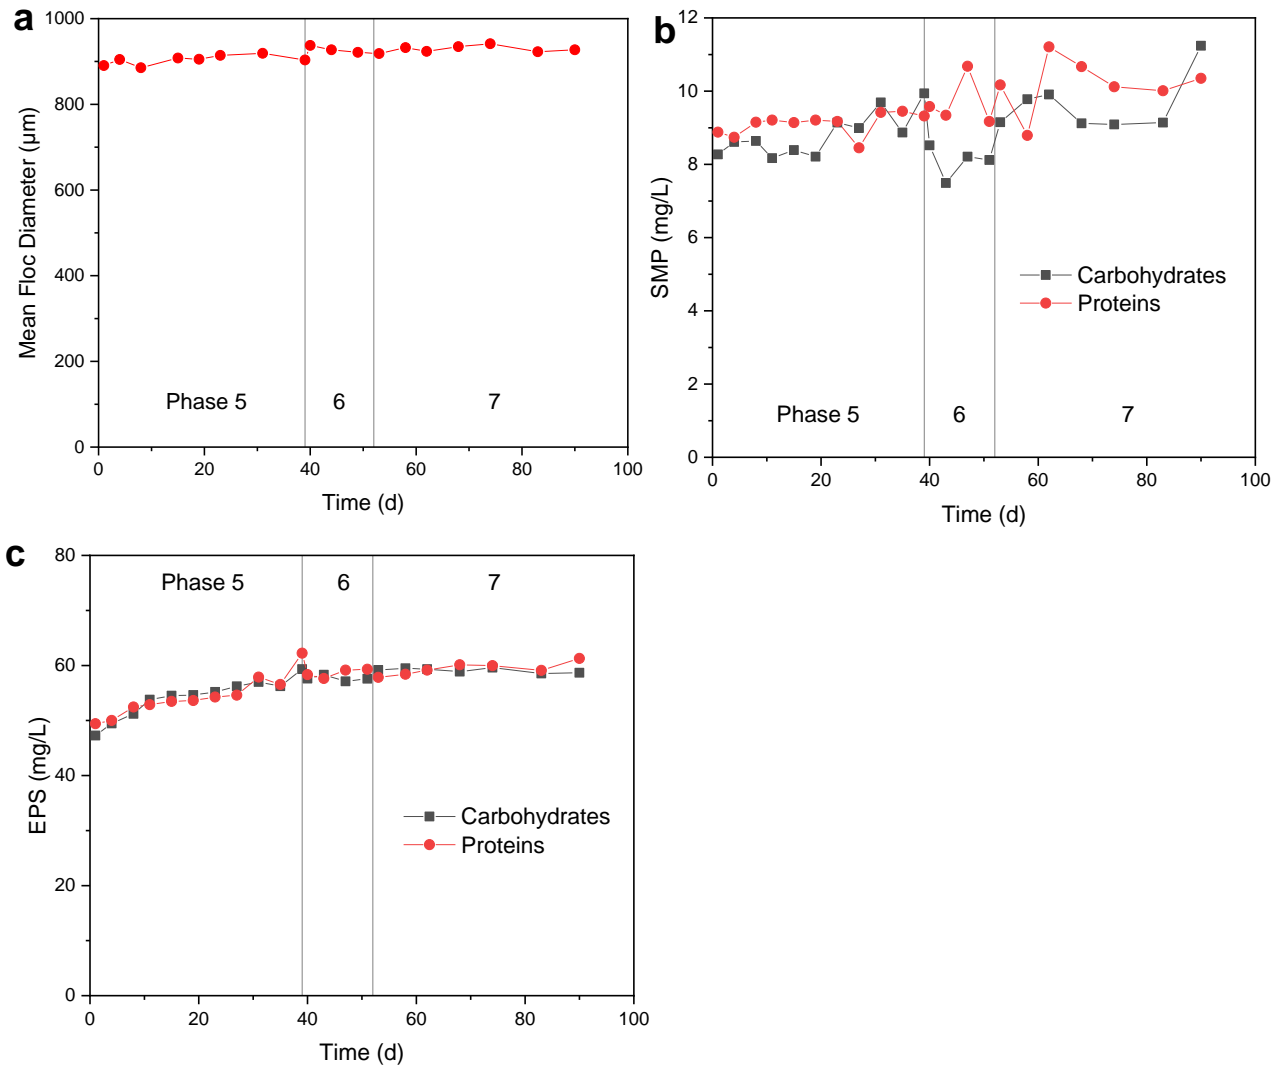

Fig. S3. Variations in mixed liquor properties during Phases 5 through 7: (a) mean floc size, (b) SMP, and (c) EPS levels.

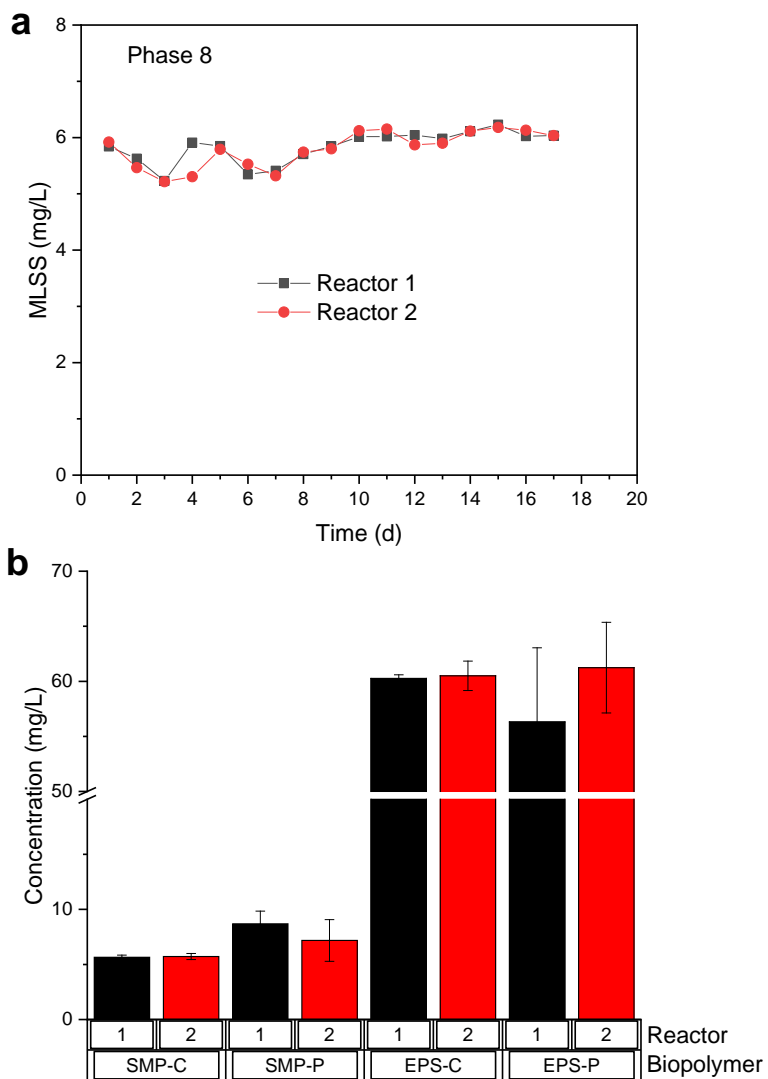

Fig. S4. Variations in the concentration of (a) biomass and (b) biopolymer in mixed liquor of Reactors 1 and 2 with time. C and P in SMP and EPS indicate carbohydrates and proteins, respectively.
